# Supplementary material for: A novel PVdF-based composite gel polymer electrolyte doped with ionomer modified graphene oxide
Source: Royal Society of Chemistry journal article supplement (doi:10.1039/c6ra16618k), 2016-01-01
Supplement: c6ra16618k1.pdf [file c6ra16618k1.pdf]

*Supporting Information for*

**A novel PVdF-based composite gel polymer electrolyte doped with  
ionomer modified graphene oxide**

Weili Li<sup>a,c\*</sup>, Zhengbao Zhu<sup>a</sup>, Wenjun Shen<sup>a</sup>, Jijun Tang<sup>a</sup>, Gang Yang<sup>a,b\*</sup>, Zhexiao Xu<sup>c</sup>,

<sup>a</sup> School of Material Science and Engineering, Jiangsu University of Science and Technology, Zhenjiang 212003, China

<sup>b</sup> Jiangsu Laboratory of Advanced Functional Material, Changshu Institute of Technology, Changshu 215500, China

<sup>c</sup> Suzhou Jiren Hi-Tech Material Co., Ltd, Suzhou 215143, China.

## Contents

**Fig. 1S.** FTIR spectra of (a) GO-Cl,(b) PAAOB,(c) IMG0

**Fig.2S.** DSC curves for the dried composite polymer membranes varied with the content of IMG0

**Fig. 3S.** Thermograms for pure PVDF membrane and the dried composite polymer membranes varied with content of IMG0

**Fig. 4S.** Stress–strain curves for the dried CPMs varied with the content of IMG0

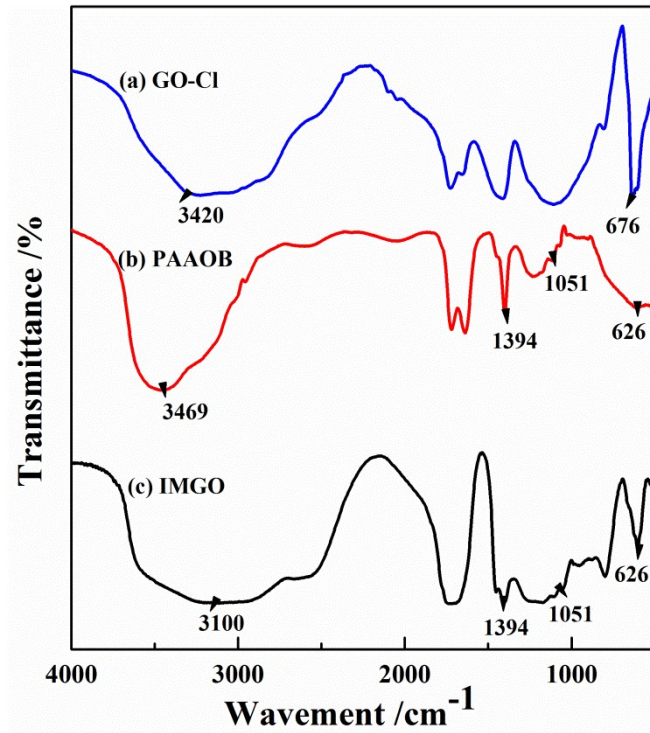

Fig. 1S. FTIR spectra of (a) GO-Cl,(b) PAAOB,(c) IMGO

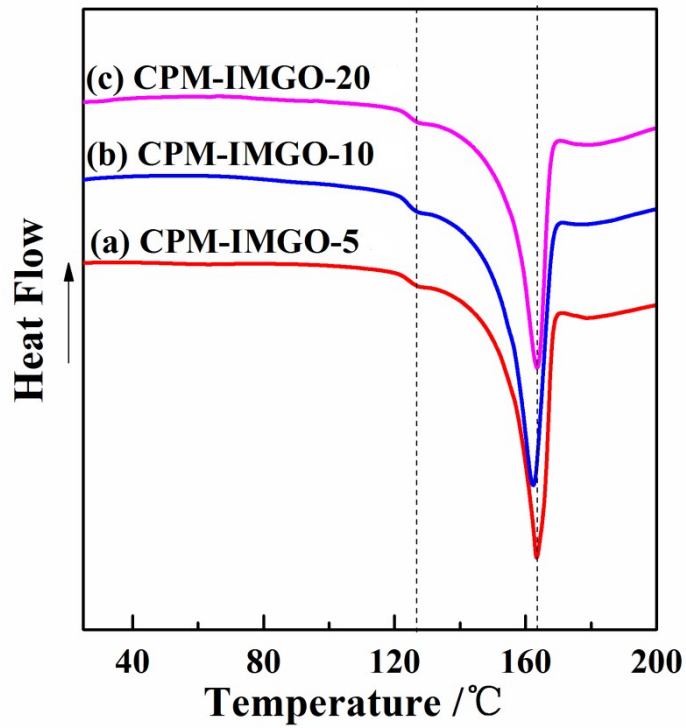

Fig. 2S.DSC curves for the dried composite polymer membranes varied with the content of  
IMGO

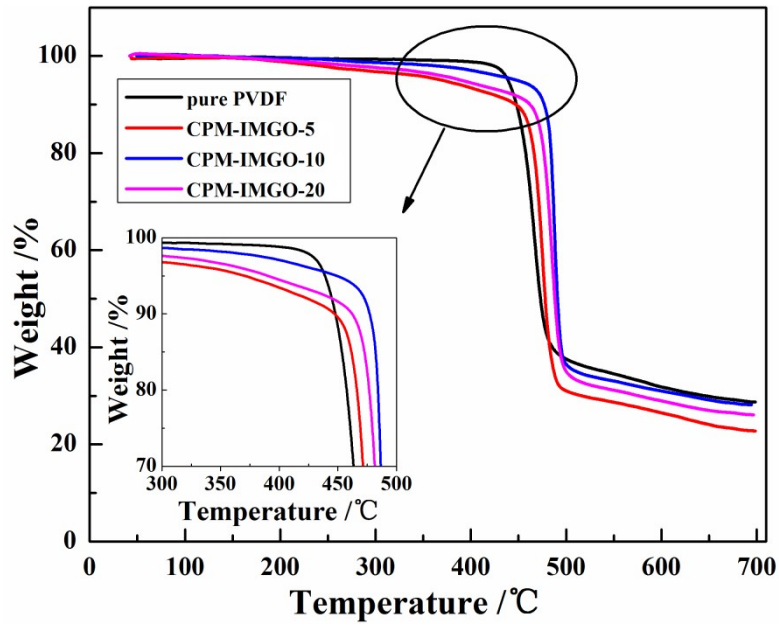

Fig. 3S. Thermograms for pure PVDF membrane and the dried composite polymer membranes varied with content of IMGO

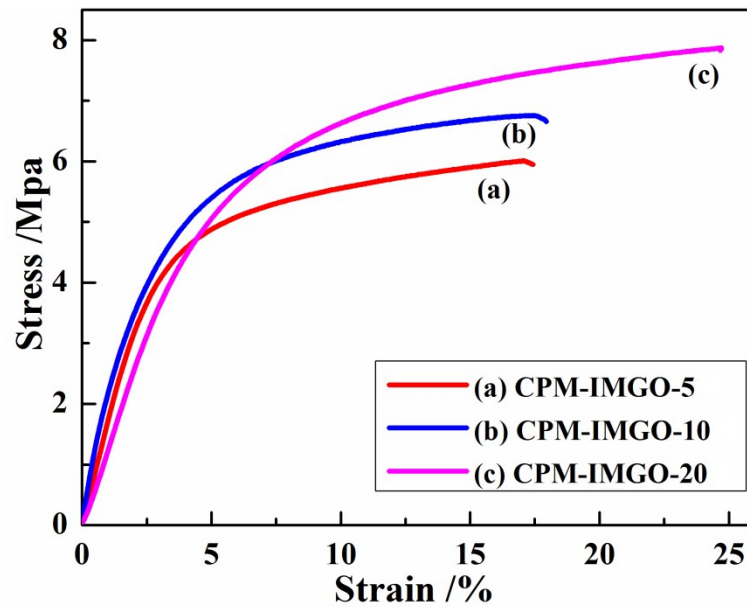

Fig. 4S. Stress-strain curves for the dried CPMs varied with the content of IMGO
